# Supplementary material for: Multiresponsive hydrogel based on polyacrylamide functionalized with thymine derivatives
Source: Royal Society of Chemistry journal article supplement (doi:10.1039/c3nj41013g), 2013-01-01
Supplement: c3nj41013g.pdf [file c3nj41013g.pdf]

## Multiresponsive hydrogel based on polyacrylamide functionalized with thymine derivatives

Ke Yang<sup>a,b,\*</sup>, Ming Zeng<sup>a</sup>

<sup>a</sup>College of Basic Medical Sciences, Changsha Medical University, Changsha  
410082, People's Republic of China

<sup>b</sup>College of Biology, Hunan University, Changsha 410082, People's Republic of  
China

\*E-mail: yangkenhm@yahoo.com.cn

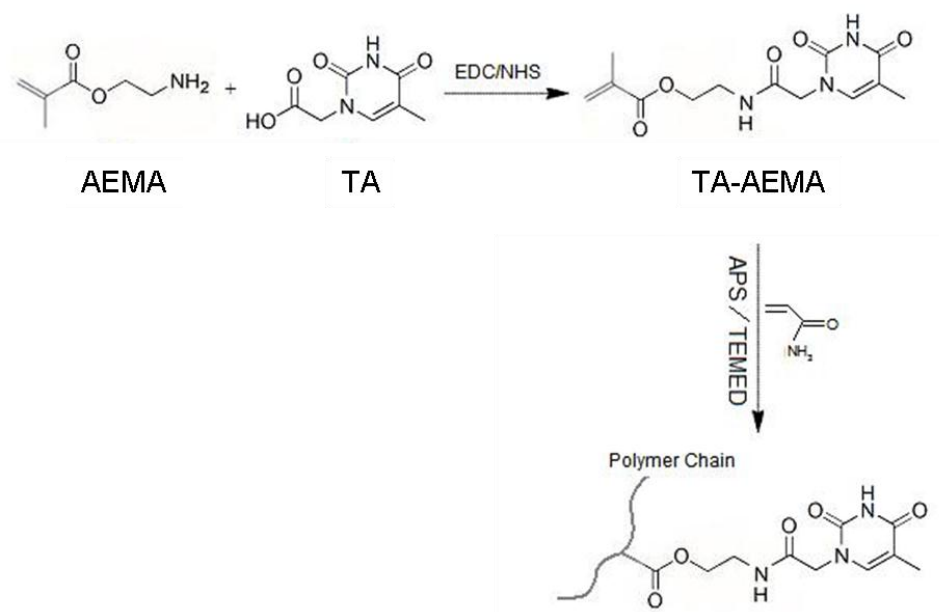

Figure S1. Synthetic route of thymine-functionalized polyacrylamide.

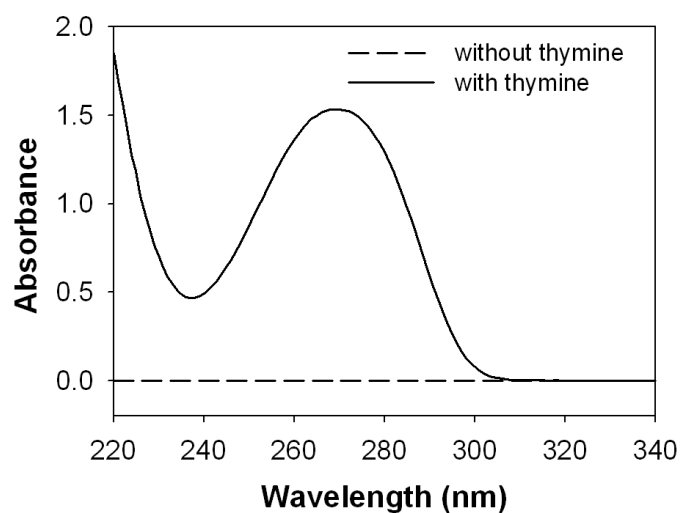

Figure S2. UV-vis spectra of polyacrylamide functionalized with and without thymine.

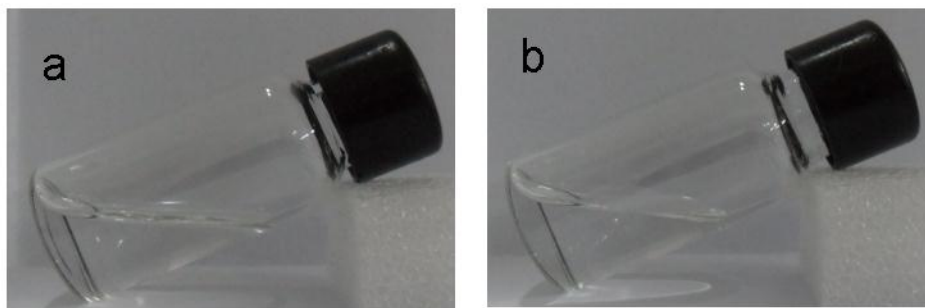

Figure S3. Photographs of thymine-unmodified polyacrylamide solutions with the concentrations of 4 wt % (a) and 20 wt % (b) after irradiation with 365 nm UV light for 2 h.

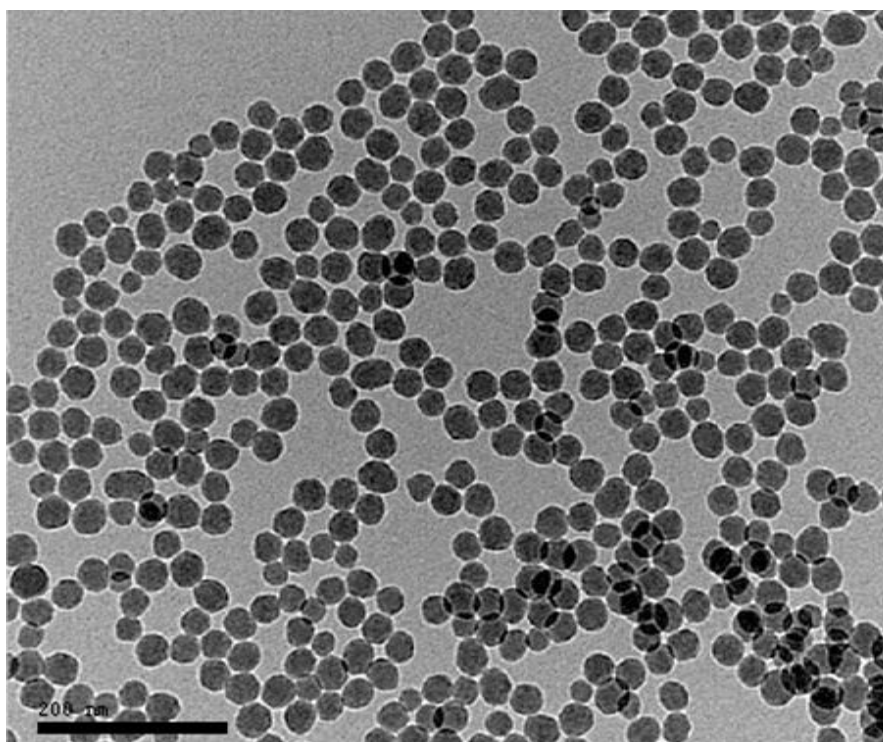

Figure S4. Transmission electron microscopy (TEM) image of  $\text{Ru}(\text{bipy})_3^{2+}$  dye-doped silica nanoparticles (FSiNPs).

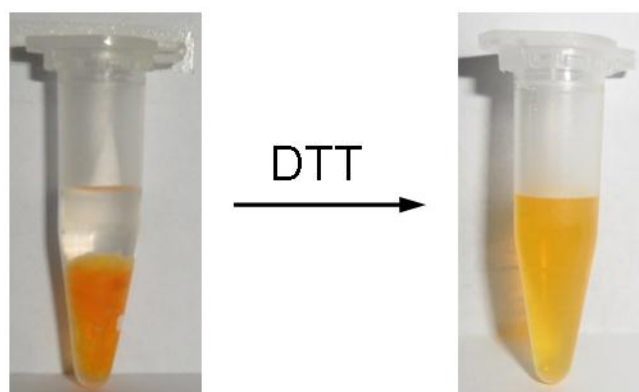

Figure S5. Photographs of  $\text{Hg}^{2+}$ -cross-linked hydrogel with entrapped FSiNPs without (left) and with (right) the addition of  $2 \mu\text{M}$  DTT for 15 min.
